# Supplementary material for: Exploring Urinary Extracellular Vesicles and Immune Mediators as Biomarkers of Kidney Injury in COVID-19 Hospitalized Patients
Source: MDPI journal article supplement (doi:10.3390/diagnostics12112600), 2022-10-27
Supplement: s1 [file s1]

**Table S1.** Linear regression models for analyzing independent variable's influence on total uEV levels

| <b>Models</b> | <b>Regression coefficients</b> | <b>Std Error</b> | <b><i>P</i>-value</b> |
|---------------|--------------------------------|------------------|-----------------------|
| Age           | 23.29                          | 68.15            | 0.734                 |
| Diabetes      | 472.65                         | 3124.10          | 0.881                 |
| Hypertension  | -1563.98                       | 2644.72          | 0.558                 |

**Table S2.** Urinary levels of immune mediators in COVID-19 hospitalized patients and healthy controls

| Parameters (pg/ $\mu$ L)           | HC<br>n= 7          | Mild/Moderate<br>(n=24) | Severe/Critical<br>(n=12) | P-value                      |
|------------------------------------|---------------------|-------------------------|---------------------------|------------------------------|
| <b>Pro-inflammatory cytokines</b>  |                     |                         |                           |                              |
| IL-1 $\alpha$                      | 1.1 $\pm$ 0.9       | 2.9 $\pm$ 3.7           | 3.3 $\pm$ 3.5             | 0.5                          |
| IL-1 $\beta$                       | 0.77 $\pm$ 0.3      | 0.94 $\pm$ 0.6          | 1.9 $\pm$ 1.2             | <b>0.02<sup>b, c</sup></b>   |
| IL-4                               | 0.26 $\pm$ 0.2      | 0.21 $\pm$ 0.15         | 1.04 $\pm$ 1.02           | <b>0.0003<sup>b, c</sup></b> |
| IL-5                               | 10.0 $\pm$ 4.6      | 9.7 $\pm$ 5.2           | 8.0 $\pm$ 4.6             | 0.51                         |
| IL-6                               | 0.33 $\pm$ 0.31     | 2.5 $\pm$ 6.0           | 177.6 $\pm$ 456.2         | <b>0.0005<sup>b, c</sup></b> |
| IL-7                               | 10.3 $\pm$ 6.3      | 8.0 $\pm$ 6.0           | 14.6 $\pm$ 4.9            | <b>0.02<sup>c</sup></b>      |
| IL-8                               | 3.6 $\pm$ 2.7       | 60.0 $\pm$ 158.7        | 33.4 $\pm$ 50.9           | 0.09                         |
| IL-9                               | 5.6 $\pm$ 2.5       | 2.8 $\pm$ 1.7           | 2.7 $\pm$ 1.8             | <b>0.02<sup>a, b</sup></b>   |
| IL-13                              | 0.17 $\pm$ 0.06     | 0.27 $\pm$ 0.48         | 0.28 $\pm$ 0.14           | <b>0.02<sup>c</sup></b>      |
| IL-16                              | 0.70 $\pm$ 0.27     | 3.5 $\pm$ 6.8           | 42.5 $\pm$ 58.6           | <b>0.003<sup>b, c</sup></b>  |
| IL-17A                             | 2.3 $\pm$ 0.7       | 2.2 $\pm$ 1.7           | 7.0 $\pm$ 8.8             | <b>0.04<sup>c</sup></b>      |
| IL-18                              | 4.2 $\pm$ 2.0       | 7.9 $\pm$ 7.4           | 11.7 $\pm$ 5.0            | <b>0.003<sup>b</sup></b>     |
| TNF- $\alpha$                      | 8.3 $\pm$ 0.8       | 14.0 $\pm$ 13.5         | 13.8 $\pm$ 7.6            | 0.3                          |
| IFN- $\gamma$                      | 13.4 $\pm$ 3.3      | 23.3 $\pm$ 25.7         | 67.4 $\pm$ 52.8           | 0.05                         |
| LIF                                | 7.2 $\pm$ 3.6       | 9.6 $\pm$ 6.7           | 53.2 $\pm$ 50.3           | <b>0.03<sup>b</sup></b>      |
| MIF                                | 53.3 $\pm$ 18.3     | 190.1 $\pm$ 387.4       | 555.2 $\pm$ 589           | <b>0.01<sup>c</sup></b>      |
| <b>Anti-inflammatory cytokines</b> |                     |                         |                           |                              |
| IL-1Ra                             | 2856 $\pm$ 2724     | 19806 $\pm$ 14112       | 25212 $\pm$ 11483         | <b>0.02<sup>a, b</sup></b>   |
| IL-2Ra                             | 57.3 $\pm$ 15.5     | 86.3 $\pm$ 136.5        | 73.4 $\pm$ 54.0           | 0.9                          |
| <b>Chemokines</b>                  |                     |                         |                           |                              |
| CCL-2                              | 94.9 $\pm$ 63.7     | 265.2 $\pm$ 607         | 47074 $\pm$ 30129         | <b>0.0001<sup>b, c</sup></b> |
| CCL-3                              | 0.15 $\pm$ 0.1      | 1.1 $\pm$ 2.1           | 2.8 $\pm$ 3.9             | <b>0.03<sup>b</sup></b>      |
| CCL-4                              | 3.3 $\pm$ 2.1       | 1.3 $\pm$ 1.7           | 2.5 $\pm$ 2.8             | <b>0.04<sup>a</sup></b>      |
| CCL-5                              | 477.9 $\pm$ 825     | 9.1 $\pm$ 12.8          | 15.9 $\pm$ 14.7           | <b>0.03<sup>a</sup></b>      |
| CCL-11                             | 14.9 $\pm$ 4.0      | 11.7 $\pm$ 15.6         | 134.6 $\pm$ 175.1         | <b>0.02<sup>c</sup></b>      |
| CXCL-9                             | 60.2 $\pm$ 44.5     | 236.8 $\pm$ 842.4       | 215.2 $\pm$ 424.6         | 0.06                         |
| CXCL-10                            | 3542 $\pm$ 3383     | 5215 $\pm$ 8783         | 92838 $\pm$ 104934        | <b>0.002<sup>b, c</sup></b>  |
| CXCL-12                            | 196408 $\pm$ 320252 | 12485 $\pm$ 46187       | 12645 $\pm$ 16856         | <b>0.04<sup>a</sup></b>      |

Supplementary Table S2. (cont)

| Parameters (pg/ $\mu$ L)         | HC<br>n= 7        | Mild/Moderate<br>(n=24) | Severe/Critical<br>(n=12) | P-value                    |
|----------------------------------|-------------------|-------------------------|---------------------------|----------------------------|
| <b>Growth factors and others</b> |                   |                         |                           |                            |
| PDGF-BB                          | 6.7 $\pm$ 1.9     | 5.2 $\pm$ 2.1           | 5.7 $\pm$ 3.5             | 0.25                       |
| FGF-B                            | 8.7 $\pm$ 1.6     | 9.6 $\pm$ 3.3           | 15.7 $\pm$ 9.3            | <b>0.008<sup>b,c</sup></b> |
| M-CSF                            | 159.4 $\pm$ 128.1 | 230.3 $\pm$ 224.5       | 444.1 $\pm$ 259.6         | <b>0.01<sup>b,c</sup></b>  |
| SCF                              | 10.4 $\pm$ 6.9    | 39.8 $\pm$ 69.8         | 104.5 $\pm$ 158.8         | 0.06                       |
| SCGF- $\beta$                    | 56.3 $\pm$ 58.8   | 112.5 $\pm$ 89.0        | 82.7 $\pm$ 88.6           | 0.23                       |
| HGF                              | 21.6 $\pm$ 13.4   | 26.5 $\pm$ 23.5         | 64.5 $\pm$ 51.9           | 0.15                       |
| TRAIL                            | 1.1 $\pm$ 0.8     | 1.3 $\pm$ 1.1           | 2.1 $\pm$ 2.3             | 0.91                       |
| CTAcK                            | 7.3 $\pm$ 2.7     | 5.6 $\pm$ 6.0           | 15.44 $\pm$ 13.5          | <b>0.01<sup>a,c</sup></b>  |

Data is presented as n (%) or mean  $\pm$  standard deviation. P-values were calculated using ANOVA test and post-test Turkey or Kruskal Wallis test post-test Dunn' (a, HC *vs* Mild/Moderate; b, HC *vs* Severe/Critical; c, Mild/Moderate *vs* Severe/Critical) and were considered statistically significant when p <0.05 (in bold).
